# Supplementary material for: Reusability and composability in process description maps: RAS–RAF–MEK–ERK signalling
Source: PubMed Central journal article supplement (PMC8425390; doi:10.1093/bib/bbab103), 2021-04-08

**Supplementary Figure S1.** The BRAF fragment of the MAPK module from the Cell Survival map of the Atlas of Cancer Signalling Networks (<https://acsn.curie.fr>) [Kuperstein 2015 PMID:26192618].

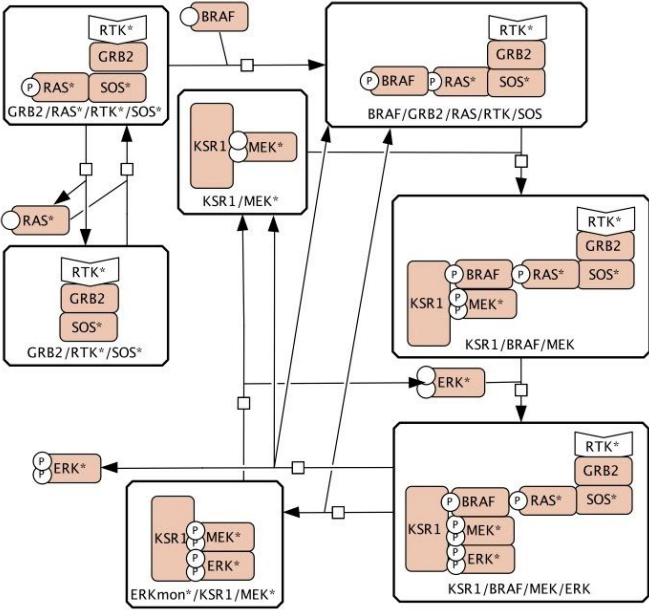

Supplement: supplementary_figure_s1_bbab103.pdf [file supplementary_figure_s1_bbab103.pdf]
