# Supplementary material for: Reusability and composability in process description maps: RAS–RAF–MEK–ERK signalling
Source: PubMed Central journal article supplement (PMC8425390; doi:10.1093/bib/bbab103), 2021-04-08

**Supplementary Figure S2.** An inferred CellDesigner's view alternative to Figure 3a - the RAF/MAP Kinase Cascade map (Pathway:R-HSA-5673001) from the Reactome pathway database (<https://reactome.org>) [Jassal 2020 PMID:31691815; Fabregat 2018 PMID:29377902].

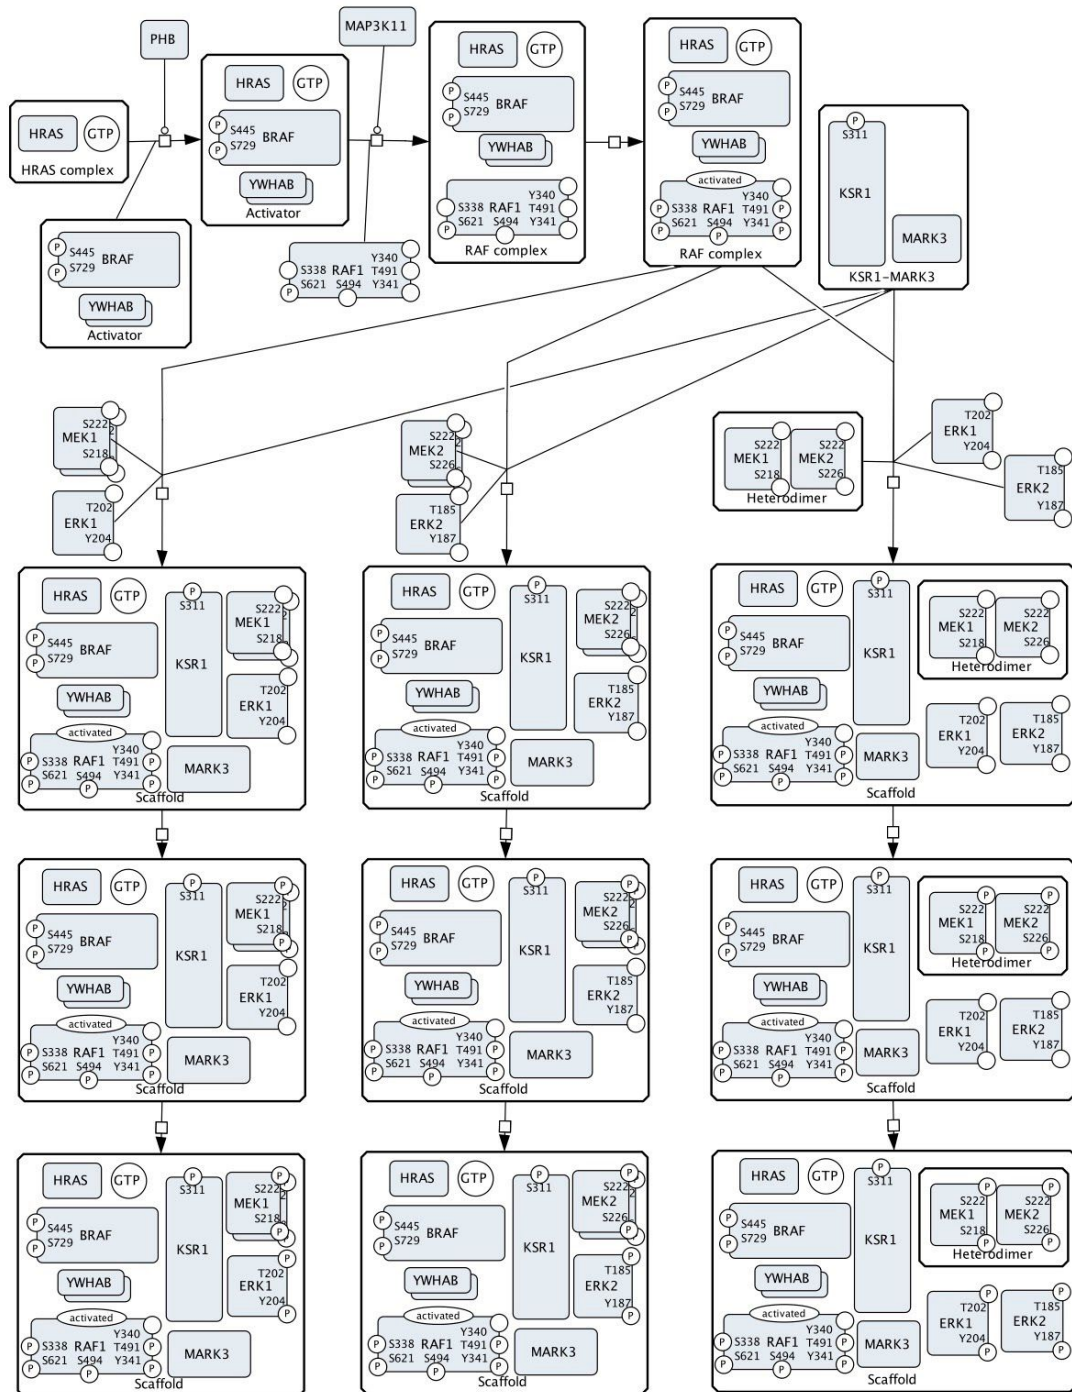

Supplement: supplementary_figure_s2_bbab103.pdf [file supplementary_figure_s2_bbab103.pdf]
