# Supplementary material for: Reusability and composability in process description maps: RAS–RAF–MEK–ERK signalling
Source: PubMed Central journal article supplement (PMC8425390; doi:10.1093/bib/bbab103), 2021-04-08
Supplement: supplementary_table_s1_bbab103.pdf [file supplementary_table_s1_bbab103.pdf]

**Supplementary Table S1.** Selected features of the maps from the Atlas of Cancer Signalling Network, PANTHER and Reactome databases.

| Features                                                                                     | ACSN |    |    | PANTHER |    |    | Reactome |    |    |
|----------------------------------------------------------------------------------------------|------|----|----|---------|----|----|----------|----|----|
|                                                                                              | 1a   | 1c | 1d | 2a      | 2b | 2c | 3a       | 3b | 3c |
| Identifiers provided for all proteins (UniProt)                                              | ✓    | ✓  | ✓  | ✓       | ✓  | ✓  | ✓        | ✓  | ✓  |
| Identifiers provided for all metabolites (ChEBI)                                             | ✓    | ✓  | ✓  | ✓       | ✓  | ✓  | ✓        | ✓  | ✓  |
| Each protein modification is described properly in SBGN-compatible format                    | ✓    | ✓  | ✓  | ✓       | ✓  | ✓  | ✓        | ✓  | ✓  |
| Each complex composition is reflected in its content in SBGN-compatible format               | ✓    | ✓  | ✓  | ✓       | ✓  | ✓  | ✓        | ✓  | ✓  |
| There are no “mixed” diagrams (no elements of the Reduced Notation of CellDesigner are used) | ✓*   | ✓* | ✓* | ✓       | ✓  | ✓  | ✓        | ✓  | ✓  |
| Available formats: CellDesigner                                                              | ✓    | ✓  | ✓  | ✓       | ✓  | ✓  | x        | x  | x  |
| Available formats: SBGN-ML 0.2                                                               | ✓    | ✓  | ✓  | x       | x  | x  | ✓        | ✓  | ✓  |
| Available formats: SBGN-ML 0.3**                                                             | x    | x  | x  | x       | x  | x  | x        | x  | x  |
| Available formats: SBML***                                                                   | ✓    | ✓  | ✓  | ✓       | ✓  | ✓  | ✓        | ✓  | ✓  |
| Available formats: BioPAX Level 2                                                            | x    | x  | x  | x       | x  | x  | ✓        | ✓  | ✓  |
| Available formats: BioPAX Level 3                                                            | x    | x  | x  | ✓       | ✓  | ✓  | ✓        | ✓  | ✓  |

\*Rare cases

\*\*Recently published version with the support for annotation and colours

\*\*\*With CellDesigner’s XML available it is possible to export the content in SBML Level 1 Version 2 - SBML Level 2 Version 4
